# Supplementary material
Source: Springer Nature journal article supplement (https://www.springermedizin.de/resource/supplementary/12936_2013_3092_MOESM7_ESM.pdf/9545444)

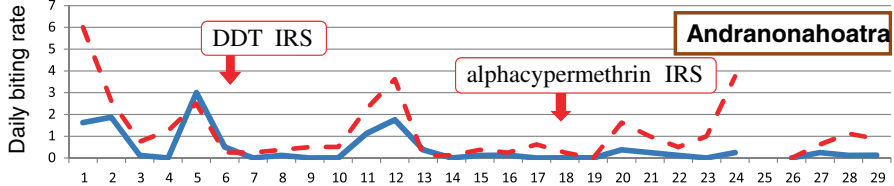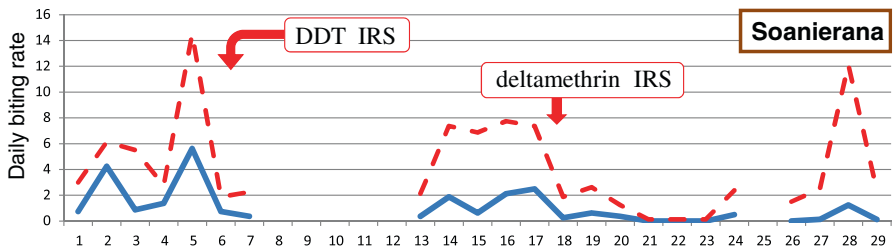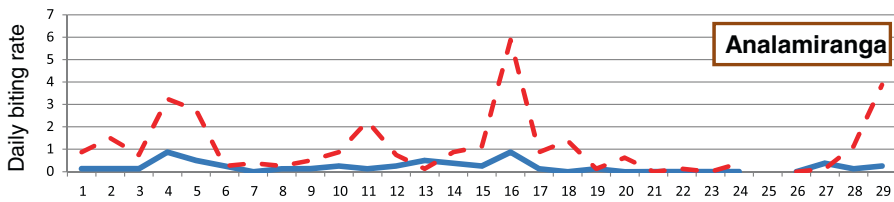

|       |      |   |   |      |   |   |   |   |   |   |   |   |      |   |   |   |   |   |   |   |   |      |   |   |   |   |   |   |   |
|-------|------|---|---|------|---|---|---|---|---|---|---|---|------|---|---|---|---|---|---|---|---|------|---|---|---|---|---|---|---|
| Month | O    | N | D | J    | F | M | A | M | J | J | A | S | O    | N | D | J | F | M | A | M | J | J    | A | S | O | N | D | J | F |
| Year  | 2002 |   |   | 2003 |   |   |   |   |   |   |   |   | 2004 |   |   |   |   |   |   |   |   | 2005 |   |   |   |   |   |   |   |

Supplement: MOESM7 [file 9545444]
